# Supplementary material for: Piezo1 is a mechanosensor of soft matrix viscoelasticity
Source: Research Square preprint supplement (doi:10.21203/rs.3.rs-6074849/v1), 2025-03-27
Supplement: Supplementary file 1 [file b653c8337b88212e768a57ad.docx]

Supplementary Materials for

**Piezo1 is a mechanosensor of soft matrix viscoelasticity**

Mariana A. G. Oliva1,2, Giuseppe Ciccone1,2, Gotthold Fläschner2, Jiajun Luo1, Jonah L.Voigt1,3,4, Patrizia Romani5, Paul Genever6, Oana Dobre1, Sirio Dupont5, Massimo Vassalli1, Pere Roca-Cusachs2,7*, Manuel Salmeron-Sanchez1,2,8*

**Affiliations**

1Centre for the Cellular Microenvironment (CeMi), University of Glasgow, The Advanced Research Centre, Glasgow, UK

2Institute for Bioengineering of Catalonia (IBEC), The Barcelona Institute for Science and Technology (BIST), Barcelona, Spain

3Max Planck Institute for Medical Research, Heidelberg, Germany.

4Cellular Biomechanics, Faculty of Engineering, Bayreuth University, Bayreuth, Germany.

**5**Department of Molecular Medicine (DMM), University of Padua, Padua, Italy

6Department of Biology, University of York, York, UK.

7University of Barcelona, Spain

8Institució Catalana de Recerca i Estudis Avançats (ICREA), Barcelona, Spain.

Corresponding authors: [proca@ibecbarcelona.eu](mailto:proca@ibecbarcelona.eu) , [msalmeron@ibecbarcelona.eu](mailto:msalmeron@ibecbarcelona.eu)

**This PDF file includes:**

Supplementary Figs. S1 to S9

Supplementary Note 1

Tables S1 to S3

Supplementary references


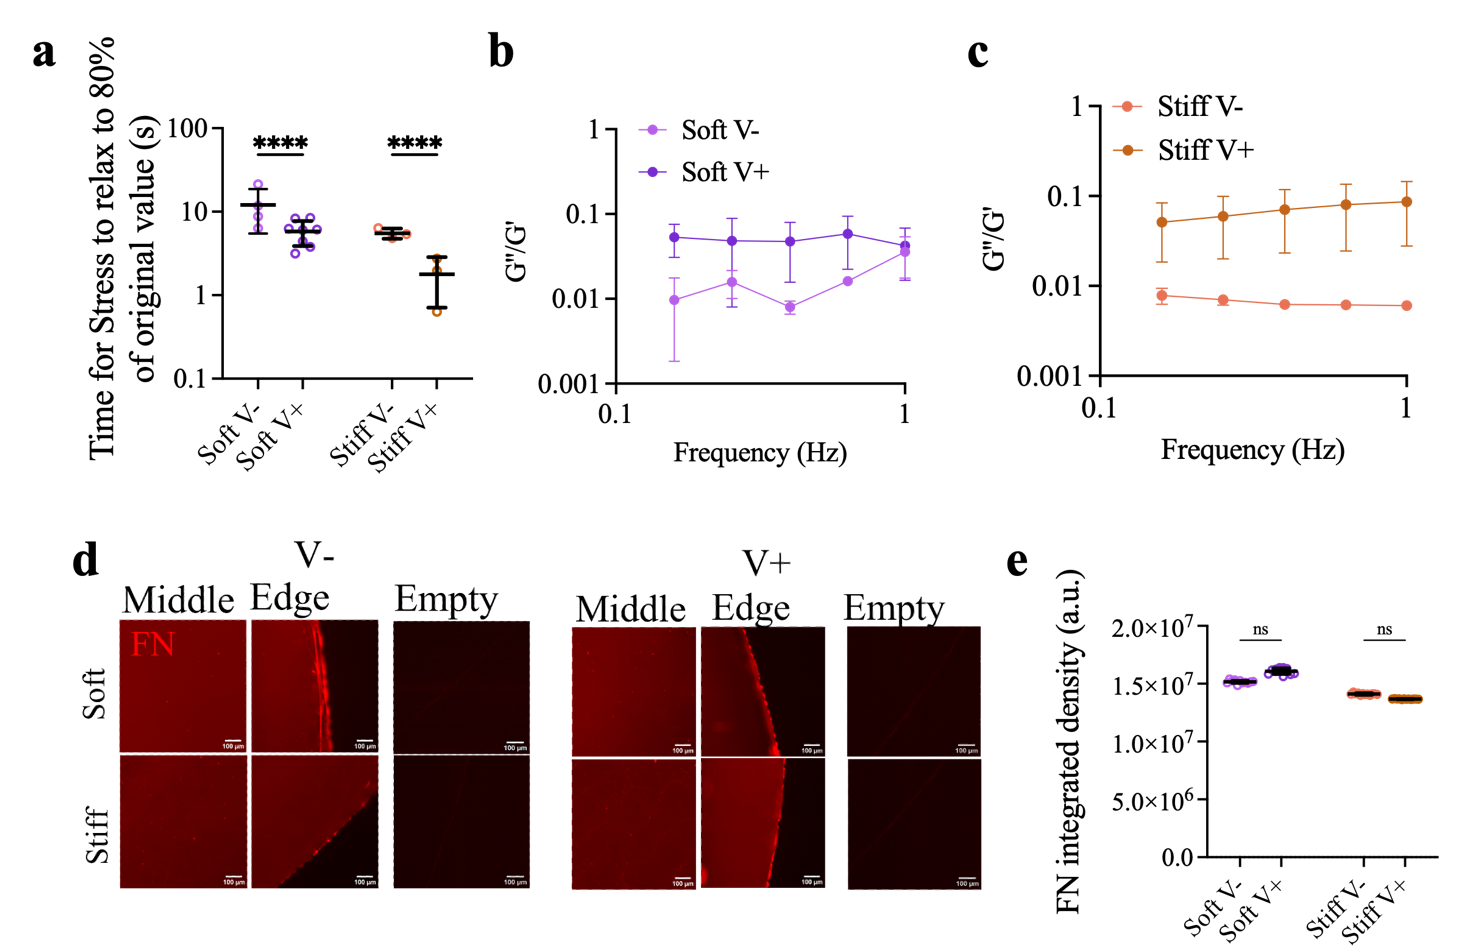


Supplementary Data Fig. 1.

(**a**) Time for stress relaxation to occur to 80% of original stress value (s) plotted for Soft (grey) and Stiff (orange) hydrogel groups. (n ≥ 61 curves, each dot represents a map of ≥ 4 single nanoindentation curves each) (**b**) G’’/G’ plot of bulk rheology frequency sweep measurements performed at 0.1% strain for the soft group. (**c**) G’’/G’ plot of bulk rheology frequency sweep measurements performed at 0.1% strain for the stiff group. Shown as mean ± SD of N = 3 hydrogels. (**d**) Representative immunofluorescence images of the 10 μg/ml fibronectin coating (red) of the hydrogels, showing the middle and edge of the hydrogel on the glass coverslip. Images of stained non-functionalised hydrogels are also shown in the empty column, for each hydrogel type. Scale bar 100 μm. (**e**) Quantification of the resulting fibronectin staining intensity (integrated density a.u.) shown as mean ± SD of different areas of n > 3 of each hydrogel N = 3. Statistical analyses were performed using a two-way ANOVA (**a**) or Kruskal-Walli’s test (**e**). P values indicating significance, ns > 0.05, **** ≤ 0.0001.


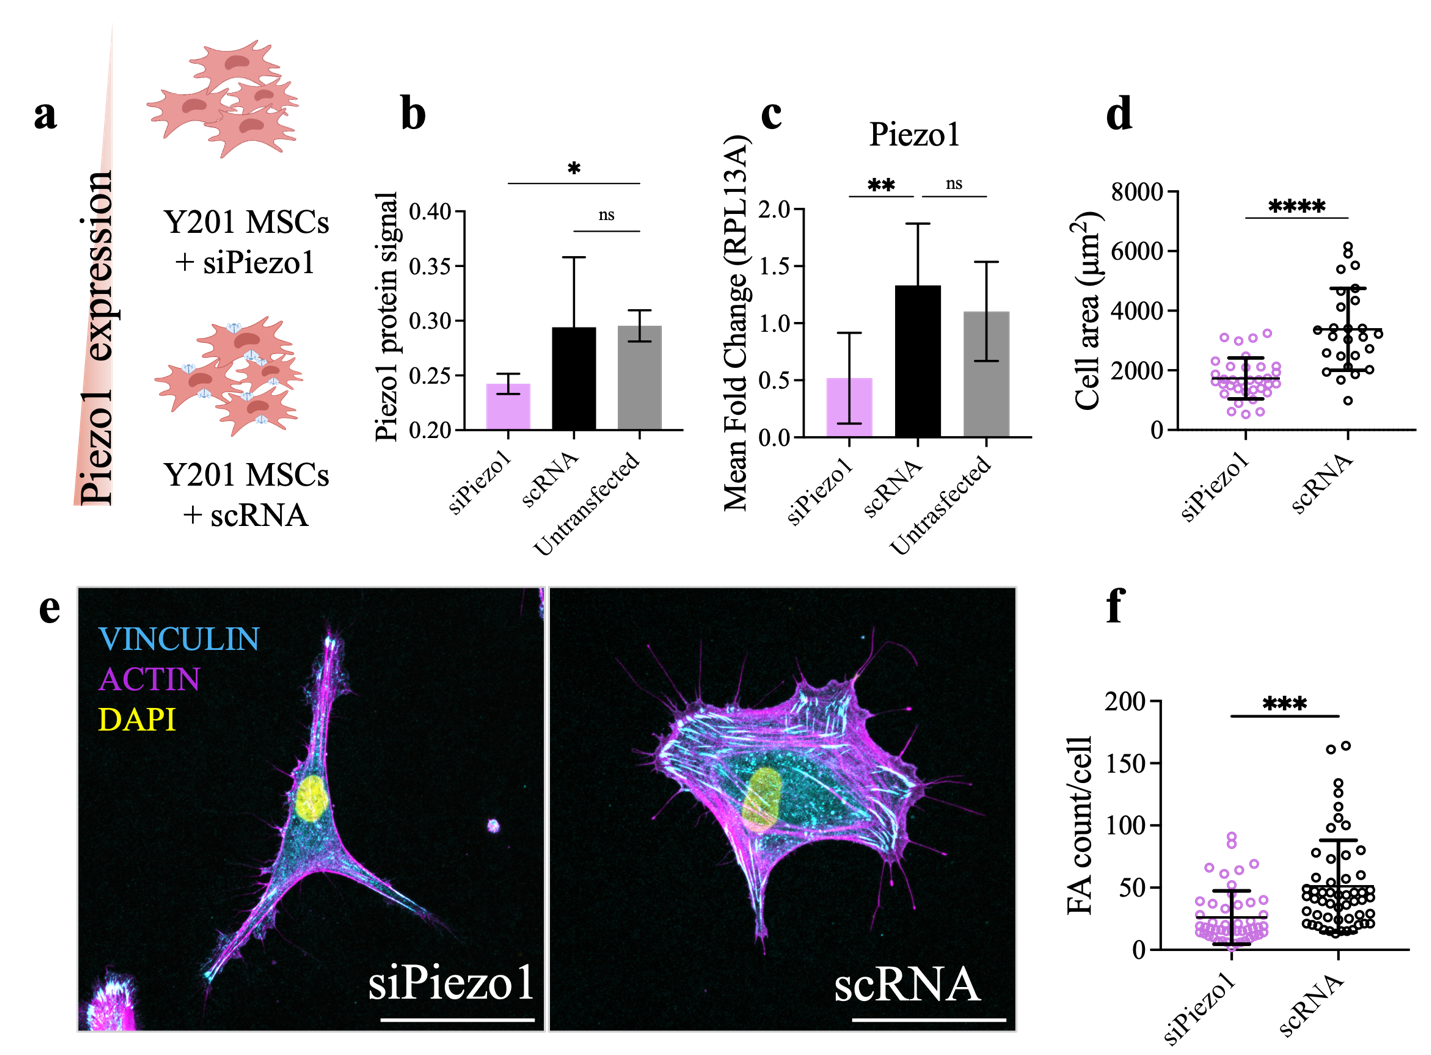


SupplementaryData Fig. 2.

(**a**) Diagram describing the two treatment conditions: Piezo1 siRNA or scRNA was used on Y201 MSCs prior to performing experiments. (**b**) Piezo1 protein signal as quantified from in cell western, shown as mean ± SD, N = 2, n ≥ 10,000 cells. (**c**) Mean fold change of Piezo1 gene expression normalised to RPL13A, shown as mean ± SD, N ≥ 4. (**d**) Cellular area was quantified after cells were left to adhere for 48h, shown as individual cell values plus mean ± SD, n ≥ 26. (**e**) Representative images of cells cultured on fibronectin coated coverslips, scale bar 50 µm. (**f**) Number of focal adhesions per cell plotted as mean ± SD per individual cell, n ≥ 48. Statistical analyses were performed using a one-way ANOVA (**b**, **c**) or unpaired t-test (**d**, **f**). P values indicating significance, ns > 0.05, *** ≤ 0.001, **** ≤ 0.0001.


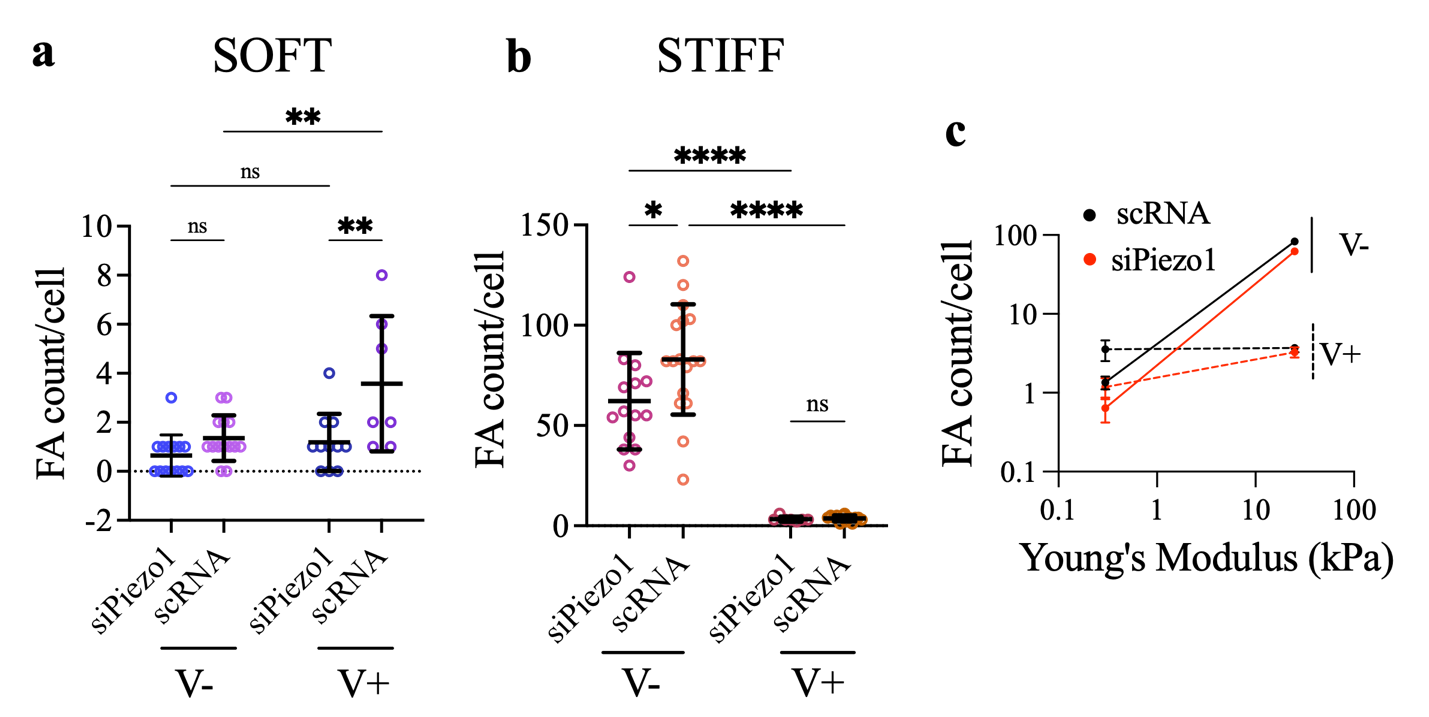


Supplementary Data Fig. 3.

Quantified total focal adhesion per cell (FA count/cell) of the soft (**a**) and stiff (**b**) hydrogel groups. Dots represent individual cell measurements, data shown as mean ± SD, n ≥ 7. (**c**) Summary of average FA count per cell ± SEM plotted as a function of stiffness for all conditions. Statistical analyses were performed using a two-way ANOVA. P values indicating significance, ns > 0.05, * ≤ 0.05, ** ≤ 0.01, *** ≤ 0.001, **** ≤ 0.0001. N ≥ 7


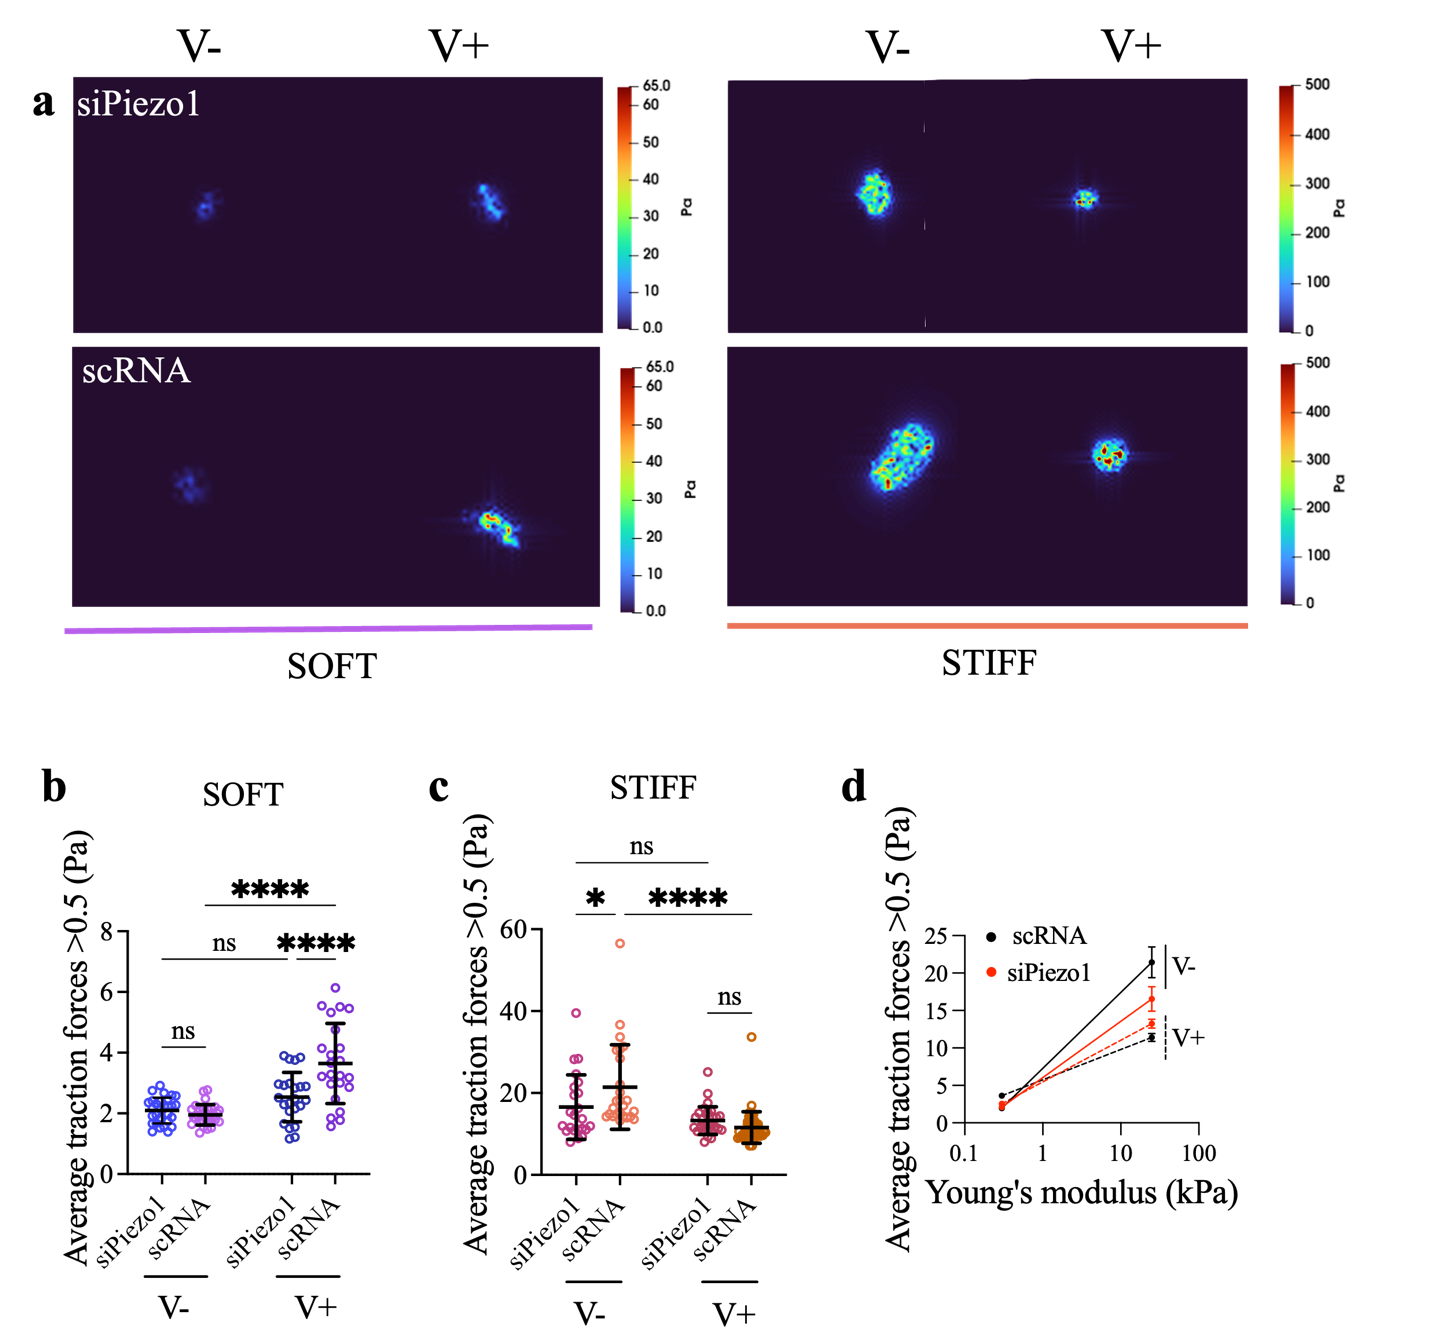


**Supplementary Data Fig. 4.**

Representative colour maps of traction forces applied by siPiezo1 (top) and scRNA (bottom) cells on soft (left) and stiff (right) hydrogel groups. Average traction forces measured on siPiezo1 and scRNA Y201 cells cultured on the soft (**b**) and stiff (**c**) hydrogel groups (n ≥ 22). (**l**) Summary of average traction forces ± SEM plotted as a function of stiffness for all experimental conditions. Statistical analyses were performed using a two-way ANOVA test. P values indicating significance, ns > 0.05, * ≤ 0.05, *** ≤ 0.001, **** ≤ 0.0001.


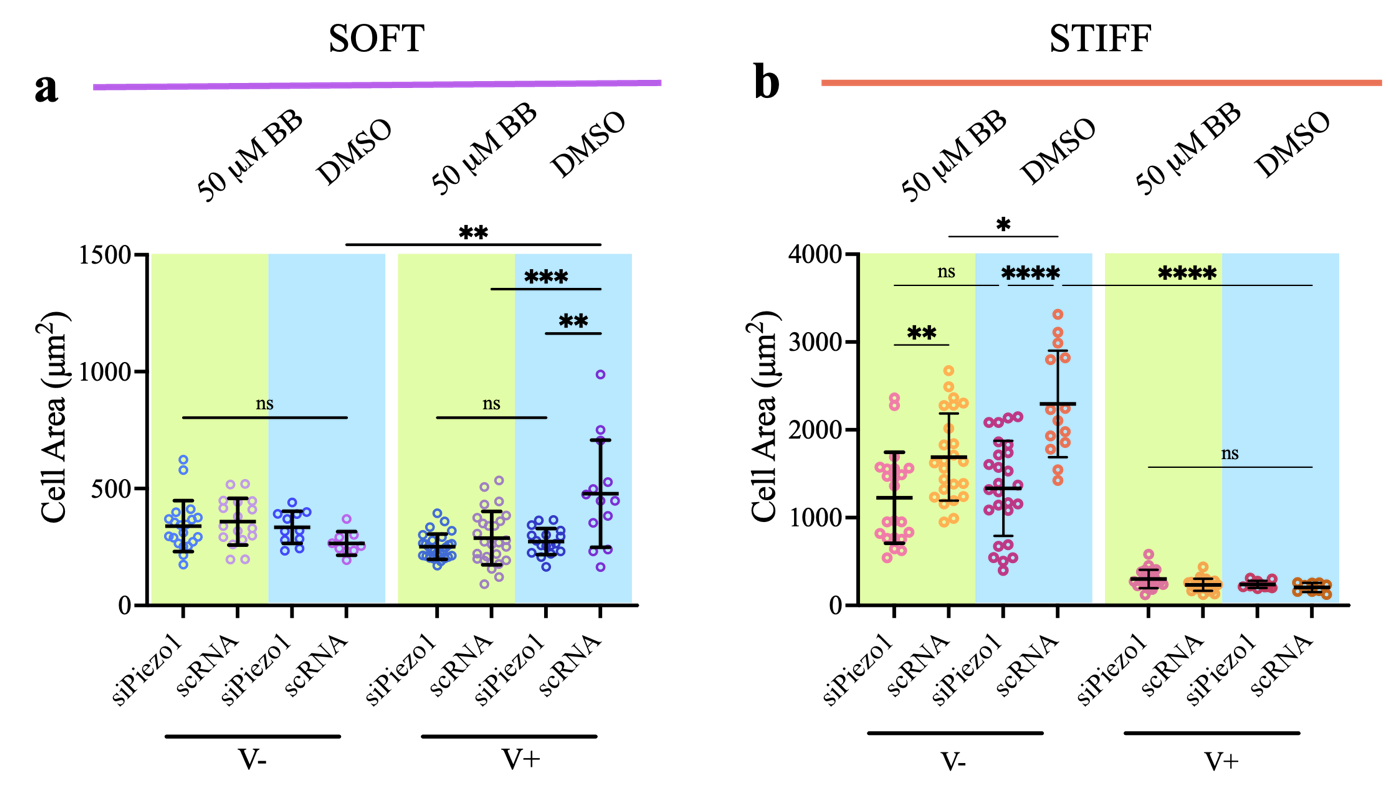


**Supplementary Data Fig. 5**.

Quantified cell area in cells with Blebbistatin (50 µM BB) treatment or without (DMSO) in the soft (**a**) and (**b**) stiff group. Data shown as mean ± SD. Blue and green shaded bars represent blebbistatin and DMSO treatment conditions, respectively. Statistical analyses were performed using a two-way ANOVA test. P values indicating significance, ns > 0.05, * ≤ 0.05, ** ≤ 0.01, *** ≤ 0.001, **** ≤ 0.0001. N ≥ 11.


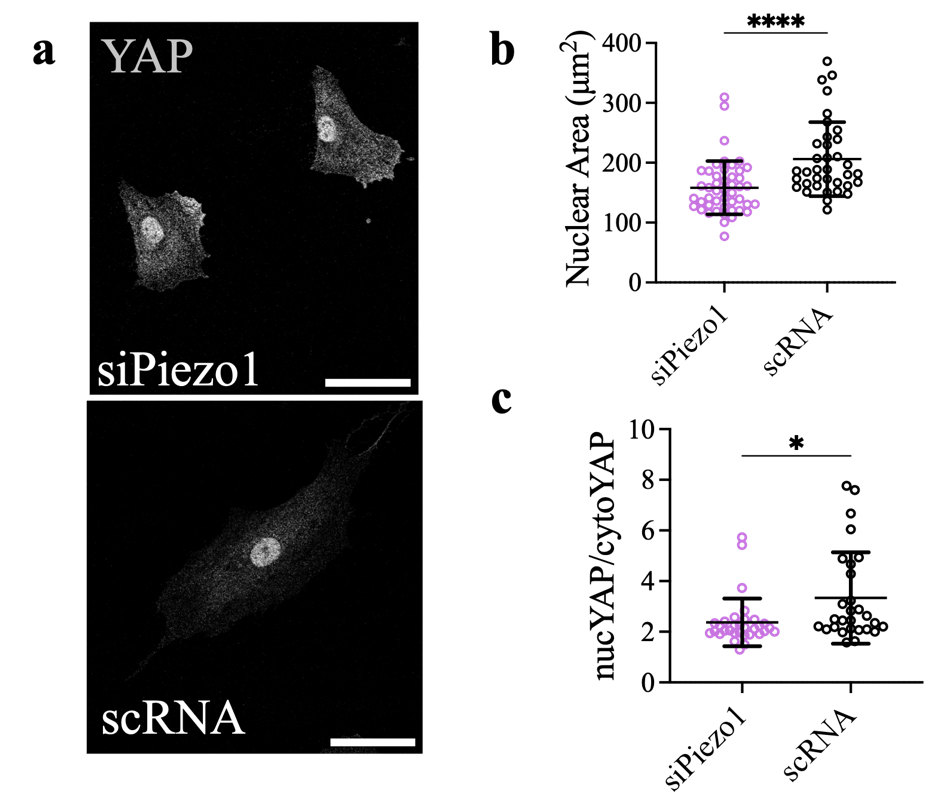


**Supplementary Data Fig. 6**.

(**a**) Representative images of YAP in (top to bottom) siPiezo1 and scRNA Y201 MSCs cultured on fibronectin coated glass coverslips for 48h. (**b**) Quantified nuclear area shown as μm2. Dots represent individual cell values and bars represent mean ± SD. (**c**) Quantified nuclear/cytoplasmic YAP ratio. Dots represent individual cell values and bars is represented as mean ± SD, n ≥ 36. Statistical analyses were performed using an unpaired t-test. P values indicating significance, * ≤ 0.05, **** ≤ 0.0001.


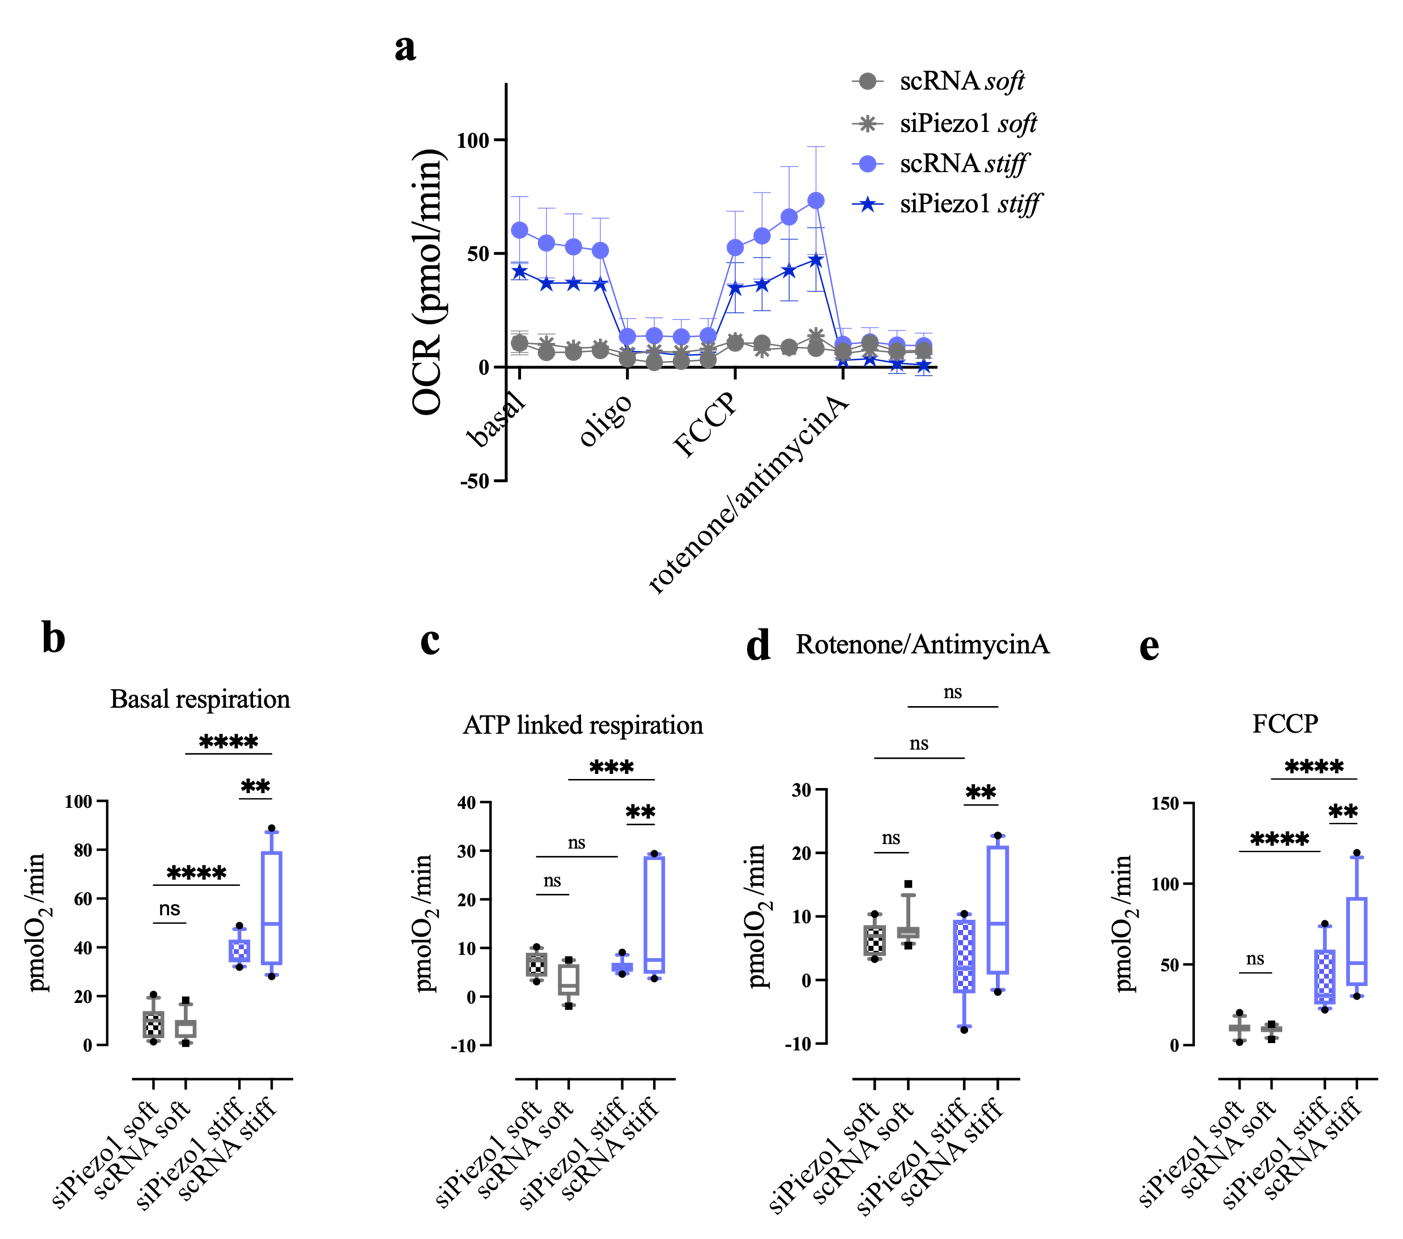


**Supplementary Data Fig. 7**.

(**a**) Oxygen Consumption Rate (OCR) profile determined with an extracellular flux analyser of siPiezo1 and scRNA cells cultured as cell monolayers on soft (E ~ 200 Pa) and stiff (E ~ 1GPa) Matrigel coated wells. Oligomycin (oligo, 0.8 μM), FCCP (0.9 μM), rotenone (1 μM) plus antimycin A (1 μM) were used to determine the basal respiration, ATP-coupled respiration, maximal respiratory capacity, and non-mitochondrial oxygen consumption, respectively. Data shown as mean ± SEM and represents two independent experiments (N=2) each with n = 4 technical repeats. (**b**) Average respiration rates in the basal respiration phase of the OCR measurements. (**d**) Average respiration rate for the ATP linked respiration phase (after oligomycin addition). (**d**) Average maximal respiration capacity respiration rates after FCCP treatment. (**e**) Average non-mitochondrial respiration rates after Rotenone/Antimycin A treatment. Data shown as Box and Whiskers plot with 10-90% whiskers. A two-way ANOVA statistical test followed by a Fisher's Least Significant Difference (LSD) test was performed. P values indicating significance, ns > 0.05, ** ≤ 0.01, *** ≤ 0.001, **** ≤ 0.0001.


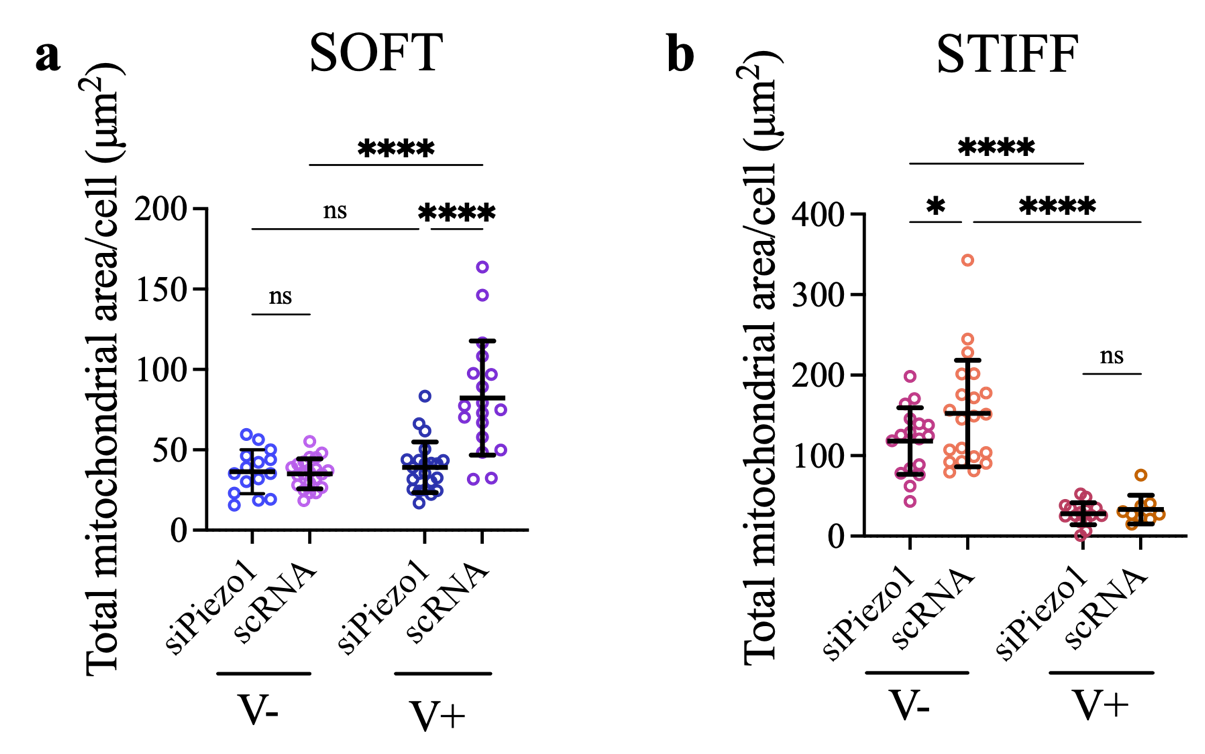


**Supplementary Data Fig. 8.**

Quantified total mitochondrial area per cell of the soft (**a**) and stiff (**b**) hydrogel

groups. All individual points represent averaged mitochondria measurements from individual cells. Data shown as mean ± SD. Statistical analyses were performed using a two-way ANOVA test. P values indicating significance, ns > 0.05, * ≤ 0.05, **** ≤ 0.0001, n ≥ 15.


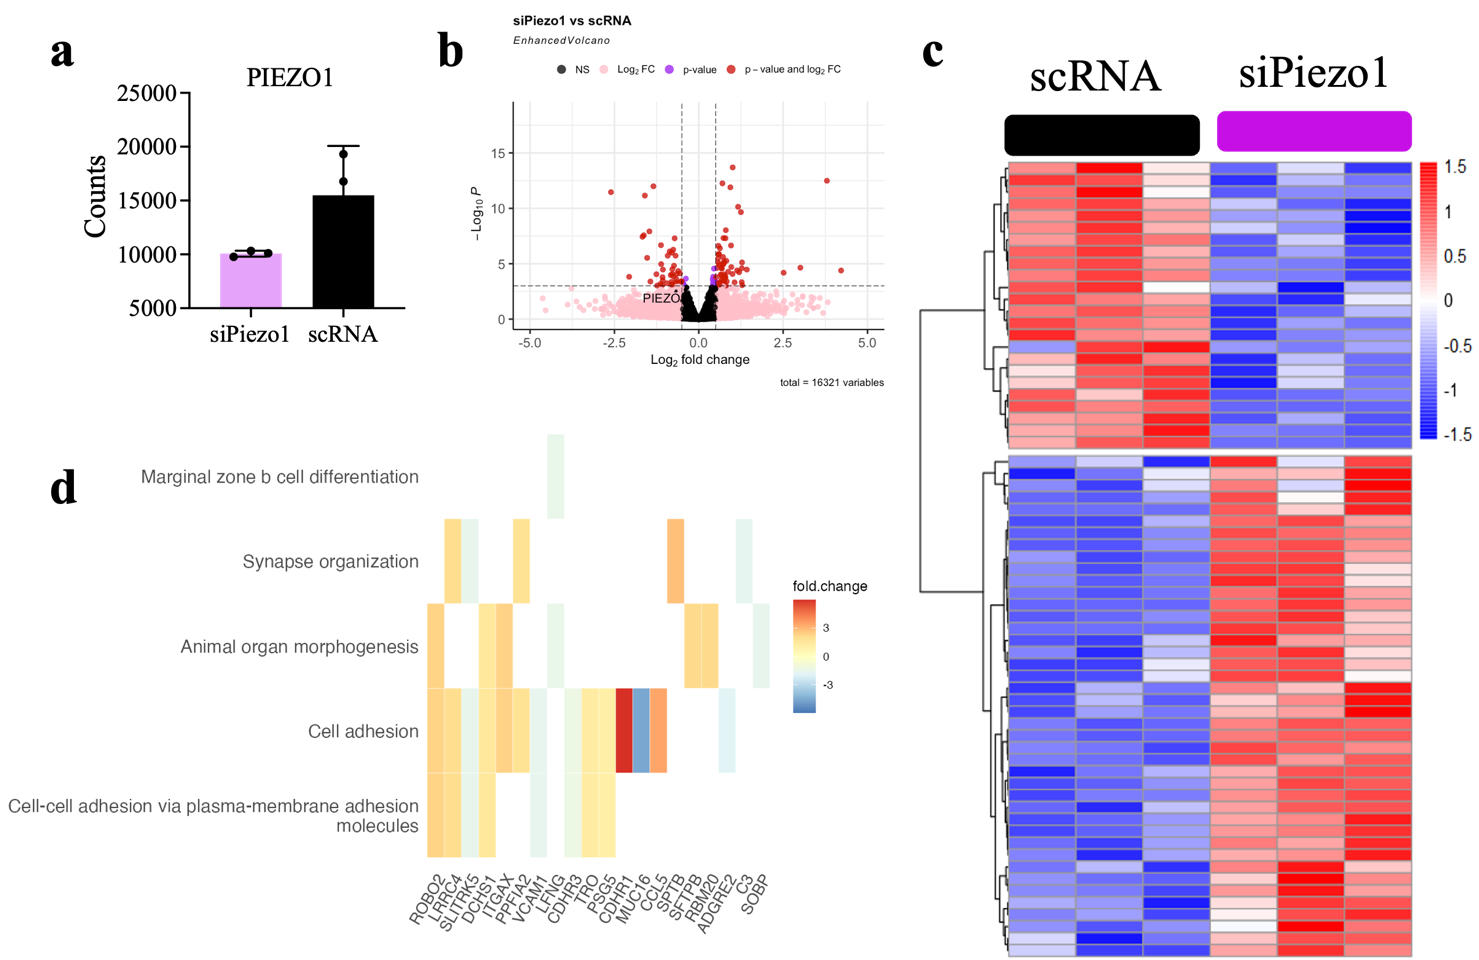


**Supplementary Fig. 9**. (**a**) Normalised Piezo1 gene counts RNAseq data from siPiezo1 and scRNA cells. (**b**) Volcano plot of statistical significance (-Log10P) vs fold change (Log 2 fold change) for siPiezo1 vs scRNA comparison. Each dot represents each individual gene. Piezo1 is highlighted on the table, with a fold change of ~-0.6. A total of 16321 genes were used to create the plot. (**c**) Heatmap of scRNA and siPiezo1 MSC differentially expressed genes (p < 0.05) (**d**) Heatmap of enriched results from ORA that encompass the most DE genes in the siPiezo1 vs scRNA comparison.

**Supplementary note 1**

**Computational model implementation and parameters**

To implement the computational clutch model for a viscoelastic substrate, we used our previously described model as a reference 1, and incorporated a standard linear solid (SLS) model for the substrate instead of a spring (**Fig. 2, e**). The SLS model consists of two springs of stiffness and , and a dashpot with viscosity , arranged in series with . The response of an SLS substrate is characterized by the instantaneous stiffness , longterm stiffness , and the relaxation time constant . With that, the constitutive equation for the substrate is given by:

where and are the substrate force and position, respectively.

The Monte Carlo simulation considers a given number of ligands on the substrate *n*l, to which integrins will bind. When bound, all ligands are connected to the substrate in parallel. The simulation starts with all ligands unbound, in which case the myosin motors are unloaded and move the actin bundle with a constant rearward speed towards the cell center. At each time step (5 ms), unbound ligands can bind to the substrate with an association rate while bound ligands can dissociate with a rate of . , where is the true binding rate characterizing each integrin-ligand bond, and is the density of integrins on the cell membrane. After every time step, the substrate position can be determined by applying the force balance between substrate and ligands (clutches) and discretizing the derivates as:

Where is the position of each ligand (clutch) and is clutch stiffness. The total force is calculated as

,

where the force on each ligand is given by:

,

The ligand position is continuously updated by the myosin motors, which pull on the ligands at a seed , determined by:

Where is the total number of myosin motors, and is the stall force of a single motor.

Reinforcement was modelled by permitting the clutch to unfold with rate , assumed to correspond to talin unfolding 2.Once the clutch unfolds, vinculin is allowed to bind at a rate , unless refolding occurs earlier with a rate of . Upon successful vinculin binding, *dadd* integrins are added to the system. To maintain a stable integrin population over time, integrins also need to be removed, which happens when the clutch unbinds. The amount of integrins is limited by a lower bound *d*int *,* corresponding to the start condition.

To capture the influence of the Piezo1, we increased by a factor to simulate a Piezo knockdown, thereby reducing the integrin binding affinity 3. Integrin removal was increased by this factor as well.

To model viscoelasticity, we used the experimentally obtained values of . For and , we converted experimental values (in units of Pa) to model parameters (in units of N/m) by assuming a given radius of adhesion *a*, as done previously 1. Further, we also considered that in experiments, between the elastic and viscoelastic case were designed to be equal as measured during nanoindentation experiments **(Fig. 1, b).** However, the contribution of viscosity to the material's response depends on the strain rate (or equivalently, the loading rate). In experiments, the area on which force is applied is determined by the nanoindenter probe diameter (27.5 µm), whereas the area of integrin adhesions applying force is likely to be smaller. Thus, we can assume that strain rates applied by cells are significantly higher compared to the nanoindenter case. At higher strain rates, the dashpot element in the viscoelastic model resists deformation more strongly, contributing to an increased instantaneous stiffness . We thus assumed an increase by a factor of 10 and maintained the observed experimental value for .

**Supplementary tables**

**Table S1.**

Model parameters.

All parameter values, except the cell type specific number of ligands, are of the same order as those employed in previous simulations that considered elasticity rather than viscoelasticity 1,2,4.

| Parameter | meaning | Value | Origin |
| --- | --- | --- | --- |
| *nm* | Number of myosin motors | 300 | Adjusted |
| *nl* | Number of ligands | 3000 | Adjusted |
| *Fm* | Myosin motor stall force | 2 pN | 5 |
| *vu* | Unloaded myosin motor velocity | 110 nm/s | 1 |
| *d*int | Initial integrin density on the membrane | 100/μm2 | Adjusted |
| *k*ont | True binding rate | 2.1x10-5 um2/s | Adjusted, of the order of values reported for αIIBβ3 6 |
| *k*off | Unbinding rate, scaling factor applied to force curve reported in 7 | 0.15 | Adjusted, catch bond dependency from 7 |
|  | Talin unfolding rate | Slip bond | 8 |
|  | Talin refolding rate | Slip bond | 8 |
| FR | Fraction of force experienced by talin | 0.073 | 2 |
|  | Clutch stiffness | 1nN/nm | 9 |
|  | Vinculin binding rate | 1x104 | Adjusted |
|  | Relaxation time of substrates | 2s | As measured |
|  | Determines magnitude of substrate relaxation | 0.08 | Adjusted, based on measurement |
|  | Fold increase inkoffafter Piezo knockdown | 1.15 | Adjusted |
| *dadd* | Integrins added after each reinforcement event | 15/μm2 | Adjusted |
| *a* | Radius of adhesion | 600 nm | Adjusted |

**Table S2.**

Hydrogel formulations.

| Reagent | Soft V- | Soft V+ | Stiff V- | Stiff V+ |
| --- | --- | --- | --- | --- |
| Aam (%) | 3 | 3 | 15 | 35 |
| BisAam (%) | 0.06 | 0.06 | 0.1 | 0.0124 |
| 40% Aam (µl) | 75 | 75 | 375 | 875 |
| 2% BisAam (µl) | 30 | 30 | 50 | 6.2 |
| mQ H2O (µl) | 812.5 | / | 565 | 108.8 |
| TEMED 1.5%/100% (µl) | 62.5 (1.5%) | 62.5 (1.5%) | 2.5 (100%) | 2.5 (100%) |
| APS 5%/10% (µl) | 20 (5%) | 20 (5%) | 7.5 (10%) | 7.5 (10%) |
| Linear Aam (µl) | / | 812.5 | / | / |
| Total volume (µl) | 1000 | 1000 | 1000 | 1000 |

Table S3.

List of antibodies and other reagents used for immunodetection.

| Reagent | Provider | Dilution |
| --- | --- | --- |
| Alexa Fluor™ 488 Phalloidin | Thermo (A12379) | 1:250 |
| Anti-YAP Antibody (63.7) | Santa Cruz (sc-101199) | 1:100 |
| Anti-Fibronectin antibody | Sigma (F3648) | 1:200 |
| Anti-Vinculin antibody | Sigma (V9264) | 1:400 |
| Anti-TOMM20 | Abcam (ab186735) | 1:200 |
| Anti-Piezo1 | Sigma (AMAB91589) | 1:100 |
| Cy™3 AffiniPure Rabbit Anti-Mouse IgG (H+L) | Jackson ImmunoResearch (315-165-003) | 1:200 |
| Donkey anti-Rabbit IgG (H+L) Alexa Fluor™ 488 | Invitrogen (A-21206) | 1:250 |
| CellTag™ 700 Stain for In-Cell Western™ Assays | Li-Cor (926-41090) | 1:500 |
| IRDye® 800CW Goat anti-Mouse IgG Secondary Antibody | Li-Cor (926-32210) | 1:500 |

**Supplementary references**

1. Elosegui-Artola, A. *et al.* Rigidity sensing and adaptation through regulation of integrin types. *Nat Mater* **13**, 631–637 (2014).

2. Elosegui-Artola, A. *et al.* Mechanical regulation of a molecular clutch defines force transmission and transduction in response to matrix rigidity. *Nat Cell Biol* **18**, 540–548 (2016).

3. Cheng, D., Wang, J., Yao, M. & Cox, C. D. Joining forces: crosstalk between mechanosensitive PIEZO1 ion channels and integrin-mediated focal adhesions. *Biochem Soc Trans* (2023) doi:10.1042/BST20230042.

4. Oria, R. *et al.* Force loading explains spatial sensing of ligands by cells. *Nature* **552**, 219–224 (2017).

5. Molloy, J. E., Burns, J. E., Kendrick-Jones, J., Tregear, R. T. & White, D. C. S. Movement and force produced by a single myosin head. *Nature* **378**, 209–212 (1995).

6. Litvinov, R. I. *et al.* Resolving Two-dimensional Kinetics of the Integrin αIIbβ3-Fibrinogen Interactions Using Binding-Unbinding Correlation Spectroscopy. *Journal of Biological Chemistry* **287**, 35275–35285 (2012).

7. Kong, F., García, A. J., Mould, A. P., Humphries, M. J. & Zhu, C. Demonstration of catch bonds between an integrin and its ligand. *Journal of Cell Biology* **185**, 1275–1284 (2009).

8. Yao, M. *et al.* Mechanical activation of vinculin binding to talin locks talin in an unfolded conformation. *Sci Rep* **4**, 4610 (2014).

9. Riveline, D. *et al.* Focal Contacts as Mechanosensors. *J Cell Biol* **153**, 1175–1186 (2001).
